# Supplementary material for: Healthcare professionals’ perception of the World Health Organization Surgical Safety Checklist and psychological safety: a cross-sectional survey
Source: PubMed Central journal article supplement — BMJ Open Qual. 2024 Dec 9;13(4):e003154. doi: 10.1136/bmjoq-2024-003154 (PMC11628965; doi:10.1136/bmjoq-2024-003154), 2024-12-09
Supplement: bmjoq-13-4-s001.pdf [file bmjoq-13-4-s001.pdf]

1 **Supplementary material**

2 Translation of Psychological Safety Scale

3 Our study “Healthcare professionals’ perception of the World Health Organization Surgical Safety  
4 Checklist and psychological safety: a cross-sectional survey”, used a Danish translation (Table S1) of  
5 Edmondsons<sup>1</sup> Psychological Safety Scale (PSS), which was originally developed and validated in  
6 English. In a five-step process, we translated PSS into Danish using WHO translation guidelines<sup>2</sup> to  
7 ensure the validity of the outcome data. A professional bilingual Danish-English translator did the  
8 forward translation, and a professional native English-speaking translator did a blind backward  
9 translation into English. In step 3, three researchers met to reach consensus on the Danish translation,  
10 a process that resulted in the final translation (Figure S1).

11

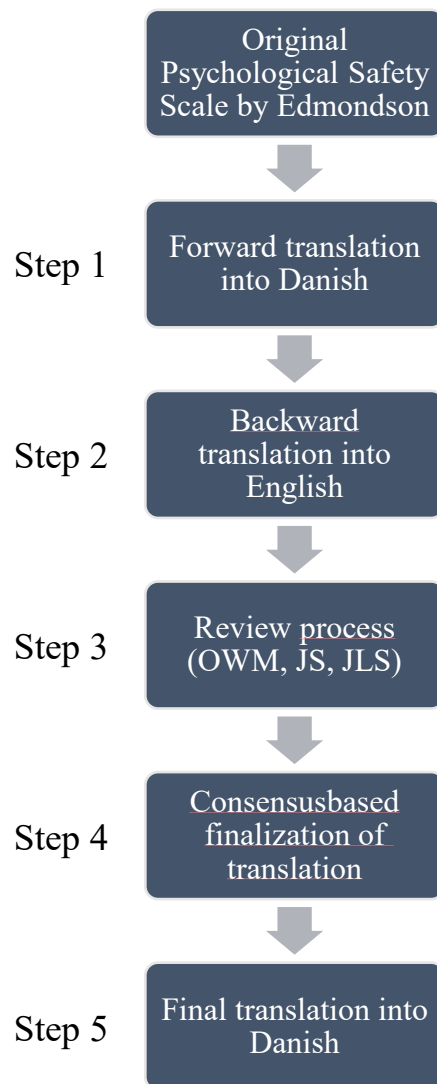

12

13

14 **Figure S1:** Overview of the five-step translation into Danish.

15

16

17 **Table S1:** Danish translation of Edmondson's Psychological Safety Scale.

18

|                                                                                                             | Meget uenig           | Uenig                 | Delvis enig           | Enig                  | Meget Enig            |
|-------------------------------------------------------------------------------------------------------------|-----------------------|-----------------------|-----------------------|-----------------------|-----------------------|
| 1. Hvis man begår en fejl i dette team, bliver man ofte bebrejdet for det                                   | <input type="radio"/> |
| 2. Deltagerne i dette team er i stand til at tage problemer og svære emner op                               | <input type="radio"/> |
| 3. I dette team afviser man nogle gange andre fordi de er anderledes.                                       | <input type="radio"/> |
| 4. Man kan trygt tage en risiko i dette team                                                                | <input type="radio"/> |
| 5. Det er vanskeligt at bede andre deltagere i dette team om hjælp                                          | <input type="radio"/> |
| 6. Ingen i dette team ville med vilje handle på en måde, der underminerer min indsats                       | <input type="radio"/> |
| 7. Når jeg arbejder sammen med deltagere i dette team, bliver mine færdigheder og evner værdsat og udnyttet | <input type="radio"/> |

19

20

21 **Additional results**

22 The distribution of items score for perceptions of the Surgical Safety Checklist (Table S2) and  
 23 Psychological Safety Scale (Table S3) is based on a 5-point Likert scale.

24

25 **Table S2:** Distribution and frequency of scores for Surgical Safety Checklist

| Surgical safety checklist item                                                                                                         | 1 Strongly disagree<br>n (%) | 2 Disagree<br>n (%) | 3 Partly agree<br>n (%) | 4 Agree<br>n (%) | 5 Strongly agree<br>n (%) |
|----------------------------------------------------------------------------------------------------------------------------------------|------------------------------|---------------------|-------------------------|------------------|---------------------------|
| 1. I have received training in the clinical use of SSC                                                                                 | 3 (3)                        | 10 (10)             | 29 (29)                 | 35 (35)          | 23 (23)                   |
| 2. I am familiar with other staff groups' important items on the SSC                                                                   | 1 (1)                        | 14 (14)             | 30 (30)                 | 43 (43)          | 12 (12)                   |
| 3. My colleagues listen when I review SSC items                                                                                        | 0 (0)                        | 10 (10)             | 39 (39)                 | 39 (39)          | 12 (12)                   |
| 4. SSC works best when only one person reviews all items on the checklist throughout all three phases (sign in, timeout, and sign out) | 1 (1)                        | 9 (9)               | 26 (26)                 | 40 (40)          | 24 (24)                   |
| 5. A visualization of SSC (e.g. poster) would help me review SSC items                                                                 | 0 (0)                        | 24 (24)             | 22 (22)                 | 31 (31)          | 23 (23)                   |
| 6. SSC increases patient safety in the operating room                                                                                  | 1 (1)                        | 0 (0)               | 10 (10)                 | 31 (31)          | 58 (58)                   |
| 7. SSC provides the opportunity to reflect on the operation                                                                            | 1 (1)                        | 4 (4)               | 18 (18)                 | 34 (34)          | 43 (43)                   |
| 8. SSC provides structure in the operating room                                                                                        | 3 (3)                        | 4 (4)               | 19 (19)                 | 37 (37)          | 37 (37)                   |
| 9. SSC enhances interdisciplinary team-work in the operating room                                                                      | 3 (3)                        | 3 (3)               | 29 (29)                 | 28 (28)          | 37 (37)                   |
| 10. SSC is unnecessarily time-consuming                                                                                                | 46 (46)                      | 43 (43)             | 8 (8)                   | 3 (3)            | 0 (0)                     |
| 11. It would be a good idea to add a couple of minutes to reflect on the operation that                                                | 1 (1)                        | 4 (4)               | 18 (18)                 | 34 (34)          | 43 (43)                   |

|                                                                                          |       |         |         |         |         |
|------------------------------------------------------------------------------------------|-------|---------|---------|---------|---------|
| just took place in continuation of the 'timeout phase'                                   |       |         |         |         |         |
| 12. I think that there is a need to implement a project on training to use SSC correctly | 5 (5) | 32 (32) | 20 (20) | 26 (26) | 17 (17) |

26 SSC, Surgical Safety Checklist

27

28 **Table S3:** Distribution and frequency of scores for Psychological Safety Scale.

| Psychological Safety Scale items                                                             | 1 Strongly disagree<br>n (%) | 2 Disagree<br>n (%) | 3 Partly agree<br>n (%) | 4 Agree<br>n (%) | 5 Strongly agree<br>n (%) |
|----------------------------------------------------------------------------------------------|------------------------------|---------------------|-------------------------|------------------|---------------------------|
| I. If you make a mistake on this team, it is often held against you (R)                      | 0 (0)                        | 2 (2)               | 11 (11)                 | 65 (65)          | 22 (22)                   |
| II. Members of this team are able to bring up problems and tough issues                      | 0 (0)                        | 5 (5)               | 44 (44)                 | 44 (44)          | 7 (7)                     |
| III. People on this team sometimes reject others for being different (R)                     | 1 (1)                        | 4 (4)               | 13 (13)                 | 61 (61)          | 21 (21)                   |
| IV. It is safe to take a risk on this team                                                   | 2 (2)                        | 9 (9)               | 42 (42)                 | 41 (41)          | 6 (6)                     |
| V. It is difficult to ask other members of this team for help (R)                            | 1 (1)                        | 5 (5)               | 8 (8)                   | 55 (55)          | 31 (31)                   |
| VI. No one on this team would deliberately act in a way that undermines my efforts           | 2 (2)                        | 6 (6)               | 15 (15)                 | 49 (49)          | 28 (28)                   |
| VII. Working with members of this team, my unique skills and talents are valued and utilized | 0 (0)                        | 2 (2)               | 28 (28)                 | 53 (53)          | 17 (17)                   |

29 R = Reversed scored.

30

31 **Table S4:** Statistical analysis of perceptions of Surgical Safety Checklist and Psychological Safety  
32 Scale.

| Outcome                          | Professions                     | Difference, (CI 95%) | p-value |
|----------------------------------|---------------------------------|----------------------|---------|
| <b>Surgical Safety Checklist</b> |                                 |                      |         |
|                                  | Residents-Gynecologists         | 0.07 (-0.72 to 0.85) | 1       |
|                                  | Anesthesiologists-Gynecologists | 0.37 (-0.5 to 1.25)  | 0.76    |

|                                                                                                                                        |                                      |                        |        |
|----------------------------------------------------------------------------------------------------------------------------------------|--------------------------------------|------------------------|--------|
| 1. I have received training in the clinical use of SSC                                                                                 | OR Nurses-Gynecologists              | 1.41 (0.69 to 2.13)    | <0.001 |
|                                                                                                                                        | Nurse anesthetists-Gynecologists     | 0.7 (-0.08 to 1.48)    | 0.1    |
|                                                                                                                                        | Anesthesiologists-Residents          | 0.3 (-0.6 to 1.2)      | 0.88   |
|                                                                                                                                        | OR Nurses-Residents                  | 1.34 (0.59 to 2.1)     | <0.001 |
|                                                                                                                                        | Nurse anesthetists-Residents         | 0.63 (-0.18 to 1.44)   | 0.2    |
|                                                                                                                                        | OR Nurses-Anesthesiologists          | 1.04 (0.19 to 1.89)    | 0.008  |
|                                                                                                                                        | Nurse anesthetists-Anesthesiologists | 0.33 (-0.57 to 1.23)   | 0.85   |
|                                                                                                                                        | Nurse anesthetists-OR Nurses         | -0.71 (-1.46 to 0.04)  | 0.07   |
| 2. I am familiar with other staff groups' important items on the SSC                                                                   | Residents-Gynecologists              | -0.22 (-1 to 0.56)     | 0.93   |
|                                                                                                                                        | Anesthesiologists-Gynecologists      | 0.42 (-0.45 to 1.29)   | 0.66   |
|                                                                                                                                        | OR Nurses-Gynecologists              | 0.5 (-0.22 to 1.21)    | 0.31   |
|                                                                                                                                        | Nurse anesthetists-Gynecologists     | 0.52 (-0.26 to 1.29)   | 0.35   |
|                                                                                                                                        | Anesthesiologists-Residents          | 0.64 (-0.25 to 1.53)   | 0.28   |
|                                                                                                                                        | OR Nurses-Residents                  | 0.72 (-0.03 to 1.46)   | 0.07   |
|                                                                                                                                        | Nurse anesthetists-Residents         | 0.74 (-0.07 to 1.54)   | 0.09   |
|                                                                                                                                        | OR Nurses-Anesthesiologists          | 0.08 (-0.76 to 0.96)   | 1      |
|                                                                                                                                        | Nurse anesthetists-Anesthesiologists | 0.1 (-0.79 to 0.99)    | 1      |
|                                                                                                                                        | Nurse anesthetists-OR Nurses         | 0.02 (-0.73 to 0.77)   | 1      |
| 3. My colleagues listen when I review SSC items                                                                                        | Residents-Gynecologists              | 0.42 (-0.24 to 1.08)   | 0.39   |
|                                                                                                                                        | Anesthesiologists-Gynecologists      | 0.16 (-0.57 to 0.9)    | 0.97   |
|                                                                                                                                        | OR Nurses-Gynecologists              | -0.49 (-1.1 to 0.12)   | 0.18   |
|                                                                                                                                        | Nurse anesthetists-Gynecologists     | -0.63 (-1.29 to 0.03)  | 0.07   |
|                                                                                                                                        | Anesthesiologists-Residents          | -0.26 (-1.02 to 0.5)   | 0.88   |
|                                                                                                                                        | OR Nurses-Residents                  | -0.91 (-1.55 to -0.28) | 0.001  |
|                                                                                                                                        | Nurse anesthetists-Residents         | -1.05 (-1.74 to -0.37) | 0.002  |
|                                                                                                                                        | OR Nurses-Anesthesiologists          | -0.65 (-1.37 to 0.06)  | 0.09   |
|                                                                                                                                        | Nurse anesthetists-Anesthesiologists | -0.79 (-1.55 to -0.04) | 0.04   |
|                                                                                                                                        | Nurse anesthetists-OR Nurses         | -0.14 (-0.77 to 0.5)   | 0.97   |
| 4. SSC works best when only one person reviews all items on the checklist throughout all three phases (sign in, timeout, and sign out) | Residents-Gynecologists              | -0.1 (-0.93 to 0.74)   | 1      |
|                                                                                                                                        | Anesthesiologists-Gynecologists      | 0.12 (-0.82 to 1.05)   | 1      |
|                                                                                                                                        | OR Nurses-Gynecologists              | 0.08 (-0.69 to 0.86)   | 1      |
|                                                                                                                                        | Nurse anesthetists-Gynecologists     | 0.17 (-0.67 to 1.01)   | 0.98   |
|                                                                                                                                        | Anesthesiologists-Residents          | 0.21 (-0.75 to 1.18)   | 0.97   |
|                                                                                                                                        | OR Nurses-Residents                  | 0.18 (-0.63 to 0.98)   | 0.97   |
|                                                                                                                                        | Nurse anesthetists-Residents         | 0.26 (-0.6 to 1.13)    | 0.92   |
|                                                                                                                                        | OR Nurses-Anesthesiologists          | -0.04 (-0.95 to 0.87)  | 1      |
|                                                                                                                                        | Nurse anesthetists-Anesthesiologists | 0.05 (-0.91 to 1.01)   | 1      |
|                                                                                                                                        | Nurse anesthetists-OR Nurses         | 0.09 (-0.72 to 0.89)   | 1      |
| 5. A visualization of SSC (e.g. poster) would help me review SSC items                                                                 | Residents-Gynecologists              | 0.59 (-0.29 to 1.47)   | 0.34   |
|                                                                                                                                        | Anesthesiologists-Gynecologists      | -0.11 (-1.09 to 0.87)  | 1      |
|                                                                                                                                        | OR Nurses-Gynecologists              | -0.77 (-1.58 to 0.05)  | 0.07   |
|                                                                                                                                        | Nurse anesthetists-Gynecologists     | -0.41 (-1.29 to 0.47)  | 0.69   |
|                                                                                                                                        | Anesthesiologists-Residents          | -0.7 (-1.71 to 0.31)   | 0.31   |
|                                                                                                                                        | OR Nurses-Residents                  | -1.35 (-2.2 to -0.51)  | <0.001 |
|                                                                                                                                        | Nurse anesthetists-Residents         | -1 (-1.91 to -0.09)    | 0.02   |

|                                                                   |                                                             |                                 |                       |      |
|-------------------------------------------------------------------|-------------------------------------------------------------|---------------------------------|-----------------------|------|
|                                                                   | OR Nurses-Anesthesiologists                                 | -0.65 (-1.6 to 0.3)             | 0.32                  |      |
|                                                                   | Nurse anesthetists-Anesthesiologists                        | -0.3 (-1.31 to 0.71)            | 0.92                  |      |
|                                                                   | Nurse anesthetists-OR Nurses                                | 0.35 (-0.49 to 1.2)             | 0.77                  |      |
| 6. SSC increases patient safety in the operating room             | Residents-Gynecologists                                     | 0.47 (-0.15 to 1.09)            | 0.22                  |      |
|                                                                   | Anesthesiologists-Gynecologists                             | -0.32 (-1.01 to 0.37)           | 0.71                  |      |
|                                                                   | OR Nurses-Gynecologists                                     | 0.26 (-0.31 to 0.83)            | 0.72                  |      |
|                                                                   | Nurse anesthetists-Gynecologists                            | 0.16 (-0.46 to 0.78)            | 0.96                  |      |
|                                                                   | Anesthesiologists-Residents                                 | -0.79 (-1.5 to -0.08)           | 0.02                  |      |
|                                                                   | OR Nurses-Residents                                         | -0.21 (-0.81 to 0.38)           | 0.86                  |      |
|                                                                   | Nurse anesthetists-Residents                                | -0.32 (-0.96 to 0.33)           | 0.65                  |      |
|                                                                   | OR Nurses-Anesthesiologists                                 | 0.58 (-0.1 to 1.25)             | 0.13                  |      |
|                                                                   | Nurse anesthetists-Anesthesiologists                        | 0.47 (-0.24 to 1.19)            | 0.35                  |      |
|                                                                   | Nurse anesthetists-OR Nurses                                | -0.1 (-0.7 to 0.49)             | 0.99                  |      |
|                                                                   | 7. SSC provides the opportunity to reflect on the operation | Residents-Gynecologists         | 0.73 (-0.04 to 1.5)   | 0.07 |
|                                                                   |                                                             | Anesthesiologists-Gynecologists | -0.42 (-1.27 to 0.44) | 0.66 |
| OR Nurses-Gynecologists                                           |                                                             | 0.35 (-0.36 to 1.06)            | 0.64                  |      |
| Nurse anesthetists-Gynecologists                                  |                                                             | 0.05 (-0.72 to 0.81)            | 1                     |      |
| Anesthesiologists-Residents                                       |                                                             | -1.15 (-2.03 to -0.27)          | 0.008                 |      |
| OR Nurses-Residents                                               |                                                             | -0.38 (-1.11 to 0.36)           | 0.62                  |      |
| Nurse anesthetists-Residents                                      |                                                             | -0.68 (-1.48 to 0.11)           | 0.12                  |      |
| OR Nurses-Anesthesiologists                                       |                                                             | 0.77 (-0.06 to 1.6)             | 0.08                  |      |
| Nurse anesthetists-Anesthesiologists                              |                                                             | 0.46 (-0.42 to 1.34)            | 0.59                  |      |
| Nurse anesthetists-OR Nurses                                      |                                                             | -0.31 (-1.05 to 0.43)           | 0.77                  |      |
| 8. SSC provides structure in the operating room                   | Residents-Gynecologists                                     | 0.57 (-0.26 to 1.4)             | 0.32                  |      |
|                                                                   | Anesthesiologists-Gynecologists                             | -0.19 (-1.11 to 0.74)           | 0.98                  |      |
|                                                                   | OR Nurses-Gynecologists                                     | -0.03 (-0.8 to 0.74)            | 1                     |      |
|                                                                   | Nurse anesthetists-Gynecologists                            | -0.06 (-0.89 to 0.77)           | 1                     |      |
|                                                                   | Anesthesiologists-Residents                                 | -0.76 (-1.71 to 0.2)            | 0.19                  |      |
|                                                                   | OR Nurses-Residents                                         | -0.6 (-1.41 to 0.2)             | 0.23                  |      |
|                                                                   | Nurse anesthetists-Residents                                | -0.63 (-1.49 to 0.23)           | 0.26                  |      |
|                                                                   | OR Nurses-Anesthesiologists                                 | 0.15 (-0.75 to 1.06)            | 0.99                  |      |
|                                                                   | Nurse anesthetists-Anesthesiologists                        | 0.13 (-0.83 to 1.08)            | 1                     |      |
|                                                                   | Nurse anesthetists-OR Nurses                                | -0.03 (-0.83 to 0.77)           | 1                     |      |
| 9. SSC enhances interdisciplinary team-work in the operating room | Residents-Gynecologists                                     | 0.22 (-0.64 to 1.07)            | 0.95                  |      |
|                                                                   | Anesthesiologists-Gynecologists                             | -0.66 (-1.61 to 0.29)           | 0.31                  |      |
|                                                                   | OR Nurses-Gynecologists                                     | -0.12 (-0.91 to 0.67)           | 0.99                  |      |
|                                                                   | Nurse anesthetists-Gynecologists                            | -0.15 (-1 to 0.7)               | 0.99                  |      |
|                                                                   | Anesthesiologists-Residents                                 | -0.88 (-1.86 to 0.1)            | 0.1                   |      |
|                                                                   | OR Nurses-Residents                                         | -0.34 (-1.16 to 0.48)           | 0.78                  |      |
|                                                                   | Nurse anesthetists-Residents                                | -0.37 (-1.25 to 0.52)           | 0.77                  |      |
|                                                                   | OR Nurses-Anesthesiologists                                 | 0.54 (-0.39 to 1.46)            | 0.49                  |      |
|                                                                   | Nurse anesthetists-Anesthesiologists                        | 0.51 (-0.47 to 1.49)            | 0.6                   |      |
|                                                                   | Nurse anesthetists-OR Nurses                                | -0.03 (-0.85 to 0.79)           | 1                     |      |
| 10. SSC is unnecessarily time-consuming                           | Residents-Gynecologists                                     | 0.05 (-0.59 to 0.69)            | 1                     |      |
|                                                                   | Anesthesiologists-Gynecologists                             | 0.44 (-0.28 to 1.16)            | 0.43                  |      |

|                                                                                                                                                |                                      |                       |      |
|------------------------------------------------------------------------------------------------------------------------------------------------|--------------------------------------|-----------------------|------|
|                                                                                                                                                | OR Nurses-Gynecologists              | -0.06 (-0.65 to 0.53) | 1    |
|                                                                                                                                                | Nurse anesthetists-Gynecologists     | -0.11 (-0.75 to 0.53) | 0.99 |
|                                                                                                                                                | Anesthesiologists-Residents          | 0.39 (-0.34 to 1.13)  | 0.58 |
|                                                                                                                                                | OR Nurses-Residents                  | -0.11 (-0.72 to 0.51) | 0.99 |
|                                                                                                                                                | Nurse anesthetists-Residents         | -0.16 (-0.82 to 0.51) | 0.96 |
|                                                                                                                                                | OR Nurses-Anesthesiologists          | -0.5 (-1.2 to 0.2)    | 0.27 |
|                                                                                                                                                | Nurse anesthetists-Anesthesiologists | -0.55 (-1.29 to 0.19) | 0.24 |
|                                                                                                                                                | Nurse anesthetists-OR Nurses         | -0.05 (-0.67 to 0.57) | 1    |
| 11. It would be a good idea to add a couple of minutes to reflect on the operation that just took place in continuation of the 'timeout phase' | Residents-Gynecologists              | 0.52 (-0.43 to 1.47)  | 0.55 |
|                                                                                                                                                | Anesthesiologists-Gynecologists      | 0.59 (-0.47 to 1.66)  | 0.53 |
|                                                                                                                                                | OR Nurses-Gynecologists              | 0.63 (-0.25 to 1.51)  | 0.27 |
|                                                                                                                                                | Nurse anesthetists-Gynecologists     | 0.47 (-0.48 to 1.42)  | 0.65 |
|                                                                                                                                                | Anesthesiologists-Residents          | 0.07 (-1.02 to 1.17)  | 1    |
|                                                                                                                                                | OR Nurses-Residents                  | 0.11 (-0.81 to 1.03)  | 1    |
|                                                                                                                                                | Nurse anesthetists-Residents         | -0.05 (-1.04 to 0.93) | 1    |
|                                                                                                                                                | OR Nurses-Anesthesiologists          | 0.04 (-0.99 to 1.07)  | 1    |
|                                                                                                                                                | Nurse anesthetists-Anesthesiologists | -0.13 (-1.22 to 0.97) | 1    |
|                                                                                                                                                | Nurse anesthetists-OR Nurses         | -0.16 (-1.08 to 0.75) | 0.99 |
| 12. I think that there is a need to implement a project on training to use SSC correctly                                                       | Residents-Gynecologists              | 0.72 (-0.3 to 1.73)   | 0.3  |
|                                                                                                                                                | Anesthesiologists-Gynecologists      | -0.17 (-1.31 to 0.97) | 0.99 |
|                                                                                                                                                | OR Nurses-Gynecologists              | 0.67 (-0.27 to 1.62)  | 0.28 |
|                                                                                                                                                | Nurse anesthetists-Gynecologists     | 0.19 (-0.83 to 1.21)  | 0.99 |
|                                                                                                                                                | Anesthesiologists-Residents          | -0.89 (-2.06 to 0.28) | 0.23 |
|                                                                                                                                                | OR Nurses-Residents                  | -0.04 (-1.02 to 0.94) | 1    |
|                                                                                                                                                | Nurse anesthetists-Residents         | -0.53 (-1.58 to 0.53) | 0.64 |
|                                                                                                                                                | OR Nurses-Anesthesiologists          | 0.85 (-0.26 to 1.95)  | 0.22 |
|                                                                                                                                                | Nurse anesthetists-Anesthesiologists | 0.36 (-0.81 to 1.53)  | 0.91 |
|                                                                                                                                                | Nurse anesthetists-OR Nurses         | -0.49 (-1.47 to 0.5)  | 0.64 |
| <b>Psychological Safety Scale</b>                                                                                                              |                                      |                       |      |
| I. If you make a mistake on this team, it is often held against you (R)                                                                        | Residents-Gynecologists              | 0.43 (-0.13 to 0.99)  | 0.21 |
|                                                                                                                                                | Anesthesiologists-Gynecologists      | 0.12 (-0.51 to 0.74)  | 0.98 |
|                                                                                                                                                | OR Nurses-Gynecologists              | 0.23 (-0.28 to 0.75)  | 0.72 |
|                                                                                                                                                | Nurse anesthetists-Gynecologists     | 0.22 (-0.34 to 0.78)  | 0.81 |
|                                                                                                                                                | Anesthesiologists-Residents          | -0.31 (-0.96 to 0.33) | 0.66 |
|                                                                                                                                                | OR Nurses-Residents                  | -0.2 (-0.74 to 0.34)  | 0.85 |
|                                                                                                                                                | Nurse anesthetists-Residents         | -0.21 (-0.79 to 0.37) | 0.85 |
|                                                                                                                                                | OR Nurses-Anesthesiologists          | 0.12 (-0.49 to 0.72)  | 0.98 |
|                                                                                                                                                | Nurse anesthetists-Anesthesiologists | 0.1 (-0.54 to 0.75)   | 0.99 |
|                                                                                                                                                | Nurse anesthetists-OR Nurses         | -0.01 (-0.55 to 0.53) | 1    |
| II. Members of this team are able to bring up problems and tough issues                                                                        | Residents-Gynecologists              | -0.43 (-1.03 to 0.18) | 0.3  |
|                                                                                                                                                | Anesthesiologists-Gynecologists      | -0.1 (-0.78 to 0.58)  | 0.99 |
|                                                                                                                                                | OR Nurses-Gynecologists              | -0.1 (-0.66 to 0.47)  | 0.99 |
|                                                                                                                                                | Nurse anesthetists-Gynecologists     | 0.05 (-0.56 to 0.66)  | 1    |
|                                                                                                                                                | Anesthesiologists-Residents          | 0.33 (-0.37 to 1.03)  | 0.69 |
|                                                                                                                                                | OR Nurses-Residents                  | 0.33 (-0.26 to 0.91)  | 0.53 |

|                                                                                    |                                      |                       |      |
|------------------------------------------------------------------------------------|--------------------------------------|-----------------------|------|
|                                                                                    | Nurse anesthetists-Residents         | 0.47 (-0.61 to 1.1)   | 0.23 |
|                                                                                    | OR Nurses-Anesthesiologists          | 0 (-0.66 to 0.66)     | 1    |
|                                                                                    | Nurse anesthetists-Anesthesiologists | 0.15 (-0.55 to 0.85)  | 0.98 |
|                                                                                    | Nurse anesthetists-OR Nurses         | 0.15 (-0.44 to 0.73)  | 0.96 |
| III. People on this team sometimes reject others for being different (R)           | Residents-Gynecologists              | 0.51 (-0.16 to 1.18)  | 0.22 |
|                                                                                    | Anesthesiologists-Gynecologists      | 0.09 (-0.66 to 0.84)  | 1    |
|                                                                                    | OR Nurses-Gynecologists              | 0.01 (-0.61 to 0.63)  | 1    |
|                                                                                    | Nurse anesthetists-Gynecologists     | 0.04 (-0.63 to 0.71)  | 1    |
|                                                                                    | Anesthesiologists-Residents          | -0.42 (-1.19 to 0.35) | 0.55 |
|                                                                                    | OR Nurses-Residents                  | -0.5 (-1.14 to 0.15)  | 0.21 |
|                                                                                    | Nurse anesthetists-Residents         | -0.47 (-1.17 to 0.22) | 0.32 |
|                                                                                    | OR Nurses-Anesthesiologists          | -0.08 (-0.8 to 0.65)  | 1    |
|                                                                                    | Nurse anesthetists-Anesthesiologists | -0.05 (-0.82 to 0.72) | 1    |
|                                                                                    | Nurse anesthetists-OR Nurses         | 0.02 (-0.62 to 0.67)  | 1    |
| IV. It is safe to take a risk on this team                                         | Residents-Gynecologists              | -0.56 (-1.25 to 0.13) | 0.17 |
|                                                                                    | Anesthesiologists-Gynecologists      | 0.24 (-0.53 to 1.01)  | 0.91 |
|                                                                                    | OR Nurses-Gynecologists              | 0.08 (-0.55 to 0.72)  | 1    |
|                                                                                    | Nurse anesthetists-Gynecologists     | 0.02 (-0.67 to 0.71)  | 1    |
|                                                                                    | Anesthesiologists-Residents          | 0.8 (0.01 to 1.59)    | 0.05 |
|                                                                                    | OR Nurses-Residents                  | 0.64 (-0.02 to 1.31)  | 0.06 |
|                                                                                    | Nurse anesthetists-Residents         | 0.58 (-0.13 to 1.29)  | 0.17 |
|                                                                                    | OR Nurses-Anesthesiologists          | -0.15 (-0.9 to 0.59)  | 0.98 |
|                                                                                    | Nurse anesthetists-Anesthesiologists | -0.22 (-1.01 to 0.57) | 0.94 |
|                                                                                    | Nurse anesthetists-OR Nurses         | -0.06 (-0.73 to 0.6)  | 1    |
| V. It is difficult to ask other members of this team for help (R)                  | Residents-Gynecologists              | 0.61 (-0.1 to 1.32)   | 0.12 |
|                                                                                    | Anesthesiologists-Gynecologists      | 0.53 (-0.26 to 1.32)  | 0.34 |
|                                                                                    | OR Nurses-Gynecologists              | 0.38 (-0.28 to 1.03)  | 0.5  |
|                                                                                    | Nurse anesthetists-Gynecologists     | 0.4 (-0.31 to 1.11)   | 0.52 |
|                                                                                    | Anesthesiologists-Residents          | -0.08 (-0.9 to 0.73)  | 1    |
|                                                                                    | OR Nurses-Residents                  | -0.23 (-0.92 to 0.45) | 0.87 |
|                                                                                    | Nurse anesthetists-Residents         | -0.21 (-0.95 to 0.52) | 0.93 |
|                                                                                    | OR Nurses-Anesthesiologists          | -0.15 (-0.92 to 0.62) | 0.98 |
|                                                                                    | Nurse anesthetists-Anesthesiologists | -0.13 (-0.95 to 0.69) | 0.99 |
|                                                                                    | Nurse anesthetists-OR Nurses         | 0.02 (-0.66 to 0.71)  | 1    |
| VI. No one on this team would deliberately act in a way that undermines my efforts | Residents-Gynecologists              | -0.1 (-0.92 to 0.73)  | 1    |
|                                                                                    | Anesthesiologists-Gynecologists      | -0.28 (-1.2 to 0.64)  | 0.92 |
|                                                                                    | OR Nurses-Gynecologists              | -0.12 (-0.88 to 0.64) | 0.99 |
|                                                                                    | Nurse anesthetists-Gynecologists     | -0.1 (-0.92 to 0.73)  | 1    |
|                                                                                    | Anesthesiologists-Residents          | -0.18 (-1.12 to 0.77) | 0.98 |
|                                                                                    | OR Nurses-Residents                  | -0.02 (-0.82 to 0.77) | 1    |
|                                                                                    | Nurse anesthetists-Residents         | 0 (-0.85 to 0.85)     | 1    |
|                                                                                    | OR Nurses-Anesthesiologists          | 0.15 (-0.74 to 1.05)  | 0.99 |
|                                                                                    | Nurse anesthetists-Anesthesiologists | 0.18 (-0.77 to 1.12)  | 0.98 |
|                                                                                    | Nurse anesthetists-OR Nurses         | 0.02 (-0.77 to 0.82)  | 1    |
|                                                                                    | Residents-Gynecologists              | -0.46 (-1.05 to 0.13) | 0.2  |



|                                                                                              |                                      |                       |      |
|----------------------------------------------------------------------------------------------|--------------------------------------|-----------------------|------|
| VII. Working with members of this team, my unique skills and talents are valued and utilized | Anesthesiologists-Gynecologists      | 0.06 (-0.6 to 0.72)   | 1    |
|                                                                                              | OR Nurses-Gynecologists              | -0.44 (-0.98 to 0.11) | 0.18 |
|                                                                                              | Nurse anesthetists-Gynecologists     | -0.25 (-0.84 to 0.34) | 0.77 |
|                                                                                              | Anesthesiologists-Residents          | 0.52 (-0.16 to 1.2)   | 0.21 |
|                                                                                              | OR Nurses-Residents                  | 0.02 (-0.55 to 0.59)  | 1    |
|                                                                                              | Nurse anesthetists-Residents         | 0.21 (-0.4 to 0.82)   | 0.87 |
|                                                                                              | OR Nurses-Anesthesiologists          | -0.5 (-1.14 to 0.14)  | 0.2  |
|                                                                                              | Nurse anesthetists-Anesthesiologists | -0.31 (-0.99 to 0.37) | 0.71 |
|                                                                                              | Nurse anesthetists-OR Nurses         | 0.19 (-0.38 to 0.76)  | 0.89 |
| <b>Psychological Safety Scale Sum Score</b>                                                  |                                      |                       |      |
| Total mean sum score                                                                         | Residents-Gynecologists              | -3.94 (-7.4 to -0.51) | 0.02 |
|                                                                                              | Anesthesiologists-Gynecologists      | -1.04 (-4.36 to 2.3)  | 0.9  |
|                                                                                              | OR Nurses-Gynecologists              | -1.7 (-4.6 to 1.2)    | 0.49 |
|                                                                                              | Nurse anesthetists-Gynecologists     | -0.9 (-3.8 to 2.03)   | 0.91 |
|                                                                                              | Anesthesiologists-Residents          | 2.89 (-0.73 to 6.5)   | 0.18 |
|                                                                                              | OR Nurses-Residents                  | 2.24 (-0.68 to 5.16)  | 0.21 |
|                                                                                              | Nurse anesthetists-Residents         | 3.04 (-0.53 to 6.6)   | 0.13 |
|                                                                                              | OR Nurses-Anesthesiologists          | -0.65 (-3.89 to 2.58) | 0.98 |
|                                                                                              | Nurse anesthetists-Anesthesiologists | 0.15 (-3.28 to 3.57)  | 1    |
|                                                                                              | Nurse anesthetists-OR Nurses         | 0.8 (-2.25 to 3.85)   | 0.95 |

33 All analysis are adjusted for multiple testing. CI, Confidence Interval; PSS, Psychological Safety  
34 Score; SSC, Surgical Safety Checklist

35

36

37 **Table S5:** Associations between Psychological Safety Sum score and perceptions of Surgical Safety  
38 Checklist, adjusted for age and profession.

| Outcome                              | Exposure                                                                                                                               | Difference, (CI 95%) | p-value |
|--------------------------------------|----------------------------------------------------------------------------------------------------------------------------------------|----------------------|---------|
| Psychological Safety Scale sum score | 1. I have received training in the clinical use of SSC                                                                                 | 0.62 (-0.14 to 1.39) | 0.11    |
|                                      | 2. I am familiar with other staff groups' important items on the SSC                                                                   | 0.8 (0.04 to 1.57)   | 0.04*   |
|                                      | 3. My colleagues listen when I review SSC items                                                                                        | 1.25 (0.36 to 2.14)  | 0.006   |
|                                      | 4. SSC works best when only one person reviews all items on the checklist throughout all three phases (sign in, timeout, and sign out) | 0.66 (-0.06 to 1.37) | 0.07    |
|                                      | 5. A visualization of SSC (e.g. poster) would help me review SSC items                                                                 | 0.05 (-0.64 to 0.75) | 0.88    |
|                                      | 6. SSC increases patient safety in the operating room                                                                                  | 0.93 (-0.04 to 1.89) | 0.06    |
|                                      | 7. SSC provides the opportunity to reflect on the operation                                                                            | 0.71 (-0.07 to 1.49) | 0.08    |
|                                      | 8. SSC provides structure in the operating room                                                                                        | 0.86 (0.15 to 1.57)  | 0.02    |
|                                      | 9. SSC enhances interdisciplinary teamwork in the operating room                                                                       | 1.1 (0.53 to 1.78)   | 0.002   |

|  |                                                                                                                                                |                        |       |
|--|------------------------------------------------------------------------------------------------------------------------------------------------|------------------------|-------|
|  | 10. SSC is unnecessarily time-consuming                                                                                                        | -1.37 (-2.27 to -0.46) | 0.004 |
|  | 11. It would be a good idea to add a couple of minutes to reflect on the operation that just took place in continuation of the 'timeout phase' | -0.05 (-0.69 to 0.59)  | 0.89  |
|  | 12. I think that there is a need to implement a project on training to use SSC correctly                                                       | 0.16 (-0.44 to 0.75)   | 0.61  |

39

40

41

42

43

44

45

46

47

48

49

50

51

52

53

\* When looking at this association, an observation with a low SSC item score and a low psychological safety score was seen, and when removing this one influential observation, the association did not persist (0.6, 95 % CI -0.15 to 1.43, p=0.11). We therefore did not consider this as an association.

CI, Confidence Interval; PSS, Psychological Safety Score; SSC, Surgical Safety Checklist

1. Edmondson A. Psychological Safety and Learning Behavior in Work Teams. *Administrative science quarterly* 1999;44(2):350-83. doi: 10.2307/2666999
2. <https://www.coursehero.com/file/30372721/WHO-Process-of-translation-and-adaptation-of-instrumentspdf/>. Accessed March 2024 [
